# Supplementary material for: Coevolution within and between Regulatory Loci Can Preserve Promoter Function Despite Evolutionary Rate Acceleration
Source: PLoS Genet. 2012 Sep 20;8(9):e1002961. doi: 10.1371/journal.pgen.1002961 (PMC3447958; doi:10.1371/journal.pgen.1002961)
Supplement: Figure S4 — C. elegans and C. briggsae promoters have a single AHR-1 core consensus motif. Sequences of the C. elegans and C. briggsae promoters of unc-47. A single, conserved AHR-1 core consensus motif (highlighted in red) is present in both promoters. (PDF) [file pgen.1002961.s004.pdf]

>Cel unc-47

ATCCCGGAACAGTCGAAAAGTCGGTGGCAAGCGCCGAACTGCTGACGGTCTAACCGGGGCACAAATCAGGGGTGAGCGGCAAAAC  
GATTTTTCCGGCAAAATCGGC AAAATCGGC AAAATGCCAATATTGAAATACCCGGCAAAATCGGTAAATAGCCGGAATTGAAAAATT  
TCCGGCAAACTGGTAAACCGCAAAATTGCTGATTTGCCGAAATTTGCCGGGAAGACGGCAATTGCCAAACATATTCGGCAAAATTG  
TGGTTTTGCACTTTTTTGAAAAATTCAGAAATTTCAATCGGC AAAATTTGTGCACATCCTATGAATTTTCTACATCTATTTTGAAA  
AGTAAGCAAAATTCATGAAAAATATCTAAAGAAAAATGGAAAAAATTTTCAAAAAGGCACAGTTTTAAGTGTTTCCGTCTAATA  
AAAAATCCCCCTAAACACTTCCGGCAAAATTGATGTTCCGGCAAAATGGCAAAATCGGAAACTTGCCGAAAAATTACAGTTTCCGGT  
AAATCGGC AAAACCGGC AAACTGCC TGAATTGAAAAGTTCCGTCAAATCGGC AAAACCGACAACACCCCTGGCACA AATGATGGA  
CATACTGAGGCAATTTGCCGGTTTTCCAATTGCAGGAAAATTTTCAATTCGGCAGTG TGCCGATTTGCCGGAATTTTAATTC  
AGGCAAAATTGCCGATTTCCCGATTTCCCGATTTGCCGGAAAAAATCGTTTGCCGCCACCCCTGGGTCTGAACCTTGATTGTT  
ACAAAAATTTTTAGCTCTTTGGAGAAAATAAAATGAATCTCGTAAAAATTTAATTGACGAGGACGATATTAGCTGTCTCTTTAG  
ACCAAATTCAGAAAAAAGAAAAGATACTTCCCAAATTTCCGGTCCCTCTCTCGTTTTTTTTTGCCAATAAACTCACTATAGTC  
GCTGGTTCCCCCTATTACATTTTATTCTACCAATCCATCAGTGGAACCAAGAAAAAGAGCCTTTCCGTTTGGAGAGTAG  
GGTCTAATAATCCCCGTGCTCTTCAAATCATTGTGCCAACACACAGACACACTTTATGTGTGCTCACACACA **CACGC** TATTT  
GAAGAGCGAAGACGACGACGACGACGATTGAGAGCTCTTTTCCACGAAATTTGCTCCATCTTTCCACAATCTGTCTTTCCTGTGA  
GACGACAGCGTCACATTTATTTTATTACAG

>Chr unc-47

GGGATTTCGGAGAACAGTAACTCAAAAAGCTCGAAATATGATTCTTCAACTTTTTCAAAGTTTTCTTTTGATATACACAGGTAGAGG  
GGCATTAAACTGCTAAATGACAGCCAAAAGAGGAGCAAAAATGGCGAATGACTGCTAGTTGGAAGCCGAAGGAGGACCGATAGAC  
TGTC AACGGACTGTGGACGGACAACCGGAACCTCTTGAAAAACCGACTTGAAAAGTTTTGATTGAAAAATCATCCAGAAAAAGATT  
ATGTTATGCTTCCACTAGATTATTTCTGATGATAGAACTACTTTTTCTCACATAAGACAACCTCAAAAAGTATATTGTTGAAC  
GACGGCTTGGTGACAGTCGAAAGGCACTGACTAGTCGATTACCGGTGGTTGGTGGACCAAATTTCTGGAGAATGGAACATTTT  
GTCAAAAATTACTTTTGGAATTATCACACTATAAAAGTCAAAGAGGACTCTGGGAATCTTCAAAAATTTATTATTAGAAGTATG  
CGGACAAAAATGACCCATTTATATTGAGAAGAAATCTCGAAAACGTTTTTTTTTTGAAAACCAAGAGAAGAATGCGCCTGAAC  
AGTGATGCTTATCGAGGTAATATAAAGACTTCAGGACTTAACAATAAAACAAATGCGTCCAGGAATTTTGAAGCGGGTCTAG  
CCAATGTTTTTTTTCTTTTTCAAAAATCCCTTTCTGTGAAAAATGATGCCGTGAGATGAAGTCCCAAATTTAGAAAAGTTTCAA  
ACATTGAAACAACACATTTGAGGAATAGGCTCTTCTTATTTTAGTAGCCAAGCAACAAACGAATTTCCATGCAACCCATCCGT  
AGACATCAAAAACGATGCTCATCTCACAGTCGTCACGTTTTTTCTGAGAATGAAGAGAAAACAAAAAAGGGGTGGAAAAGAAATCG  
AATAGGAAAATAGGGGATTACTCAATTCCAATCCCAACCGAATCTCATTTCAAAAAACTCTCAACCAACTAATCCCACATTGCC  
TCGAGATTCTTTTTTCTGTAATGTGTTTCTGAATGGACTGTAAGATTGATGTTCTCATTTTCTTTTCTCTAAAAAACAGCC  
TTCAAATTTCCGGAGCACAAAGTCCCTCAACCCCAATAGGTTGCTCCTTTCTCTTTTCTTATTCTCACTCATCCATCA  
GGGAACCAAAAAGAAAACGAATAAGAAGAAGAGTCTTCGGAGAAGAGCGTCTAATAATCCCTGCTTCAAATCATTGTGCCAAC  
ACAGACACACTTTATGGGCCAGAAC **CACGC** TATTTGAAGAGCAACGACGACGATGACGAGCGCCCAAGAGGTCTCCAGAGCTC  
TTTTCACAAATCTCTTCTTTTCAAAAACCGGTGGTTCTTTCAAGTTTGTGTTTCTTACAGAC

**Figure S4. *C. elegans* and *C. briggsae* promoters have a single AHR-1 core consensus motif.**

Sequences of the *C. elegans* and *C. briggsae* promoters of *unc-47*. A single, conserved AHR-1 core consensus motif (highlighted in red) is present in both promoters.
