# Supplementary material for: Coevolution within and between Regulatory Loci Can Preserve Promoter Function Despite Evolutionary Rate Acceleration
Source: PLOS journal article supplement (doi:10.1371/journal.pgen.1002961), 2012-09-20
Supplement: S7 (10.1371/journal.pgen.1002961.s007) [file journal.pgen.1002961.s007.pdf › journal.pgen.1002961.s007.pdf]

| <b>Strains</b>            | <b>animals expressing in SDQR/total</b> | <b>animals expressing in SDQL/total</b> | <b>animals expressing in DVB/total</b> |
|---------------------------|-----------------------------------------|-----------------------------------------|----------------------------------------|
| <b>Figure 3</b>           |                                         |                                         |                                        |
| 777bp strain 1            | 37/49                                   | 22/35                                   | 44/49                                  |
| 777bp strain 2            | 39/47                                   | 38/53                                   | 81/99                                  |
| 777bp mut strain 1        | 0/39                                    | 0/28                                    | 38/50                                  |
| 777bp mut strain 2        | 0/30                                    | 0/30                                    | 33/43                                  |
| 254bp strain 1            | 30/52                                   | 2/45                                    | 90/98                                  |
| 254bp strain 2            | 17/55                                   | 0/45                                    | 62/99                                  |
| 254bp mut strain1         | 0/71                                    | 0/71                                    | 3/71                                   |
| 254bp mut strain 2        | 0/69                                    | 0/69                                    | 2/69                                   |
| <b>Figure 4</b>           |                                         |                                         |                                        |
| RA-el strain 1            | 54/60                                   | 3/60                                    |                                        |
| RA-el strain 2            | 30/43                                   | 5/43                                    |                                        |
| RA-bri strain 1           | 35/44                                   | 5/44                                    |                                        |
| RA-bri strain 2           | 61/75                                   | 7/75                                    |                                        |
| <b>Figure 5</b>           |                                         |                                         |                                        |
| Cbre full length strain 1 | 6/100                                   | 6/100                                   |                                        |
| Cbre full length strain 2 | 3/100                                   | 13/100                                  |                                        |
| Cbre proximal strain 1    | 0/100                                   | 0/100                                   |                                        |
| Cbre proximal strain 2    | 1/100                                   | 1/100                                   |                                        |
| Cre full length strain 1  | 2/100                                   | 0/100                                   |                                        |
| Cre full length strain 2  | 1/100                                   | 1/100                                   |                                        |
| Cre proximal strain 1     | 1/100                                   | 0/100                                   |                                        |
| Cre proximal strain 2     | 3/100                                   | 0/100                                   |                                        |

**Table S1. Consistency of independent strains.**
